# Supplementary material for: Incidence and Treatments of Bovine Mastitis and Other Diseases on 37 Dairy Farms in Wisconsin
Source: MDPI journal article supplement (doi:10.3390/pathogens11111282), 2022-11-01
Supplement: s1 [file s1]

**Supplementary Table S1.** Farm level descriptors of 37 Wisconsin dairy farms and the incidence rate of selected bovine diseases.

| Farm | RHA <sup>1</sup> | Cow-lactations-year |        |      |                   | Parity |      |      | BTSCC <sup>2</sup> | Antibiotic<br>treatments <sup>3</sup> | Incidence rate <sup>4</sup> |      |      |      |      |     |      |      |      |
|------|------------------|---------------------|--------|------|-------------------|--------|------|------|--------------------|---------------------------------------|-----------------------------|------|------|------|------|-----|------|------|------|
|      |                  | Total               | Culled | Died | %                 | 1      | 2    | ≥3   |                    |                                       | CM                          | ME   | RFM  | KE   | FD   | DA  | PN   | MF   | DI   |
|      |                  |                     |        |      | Culled<br>or died |        |      |      |                    |                                       |                             |      |      |      |      |     |      |      |      |
| 1    | 13,141           | 2763                | 880    | 120  | 36.2              | 1045   | 817  | 901  | 122                | 21.4                                  | 44.3                        | 6.4  | 5.5  | 16.5 | 57.7 | 2.2 | 7.7  | 1.3  | 2.6  |
| 2    | 14,878           | 474                 | 162    | 14   | 37.1              | 194    | 137  | 143  | 80                 | 18.1                                  | 29.9                        | 7.2  | 8.9  | 7.0  | 88.1 | 5.3 | 0.2  | 0.4  | 5.3  |
| 3    | 13,313           | 593                 | 102    | 125  | 38.3              | 208    | 150  | 235  | 175                | 35.0                                  | 1.7                         | 9.4  | 3.0  | 8.3  | 34.6 | 6.2 | 2.9  | 0.7  | -    |
| 4    | 13,608           | 1414                | 272    | 143  | 29.3              | 520    | 425  | 469  | 110                | 95.8                                  | 33.9                        | 15.8 | 15.4 | 1.6  | 4.1  | 4.5 | 9.4  | 26.1 | -    |
| 5    | 14,389           | 358                 | 133    | 8    | 39.3              | 143    | 95   | 120  | 78                 | 49.2                                  | 39.9                        | 36.8 | 8.4  | 16.5 | 5.9  | 5.9 | 0.6  | 1.4  | 2.5  |
| 6    | 13,103           | 797                 | 272    | 47   | 40.0              | 295    | 216  | 286  | 120                | 40.6                                  | 25.3                        | 5.4  | 3.0  | 13.7 | 25.7 | 2.3 | 1.9  | 0.4  | -    |
| 7    | 12,928           | 441                 | 162    | 10   | 39.0              | 154    | 123  | 164  | 86                 | 83.8                                  | 8.4                         | 18.4 | 4.3  | 31.5 | 0.9  | 0.7 | 1.4  | 2.3  | 0.9  |
| 8    | 13,140           | 2405                | 733    | 125  | 35.7              | 888    | 676  | 841  | 187                | 92.4                                  | 20.4                        | 4.7  | 3.0  | 1.5  | 3.4  | 2.7 | 1.6  | 0.3  | 0.1  |
| 9    | 10,829           | 2163                | 922    | 22   | 43.6              | 844    | 667  | 652  | 195                | 89.0                                  | 27.7                        | 12.9 | 1.7  | -    | 0.05 | 2.2 | 0.9  | 0.0  | 0.05 |
| 10   | 14,061           | 618                 | 203    | 20   | 36.1              | 267    | 183  | 168  | 105                | 44.1                                  | 25.6                        | 0.2  | 2.1  | -    | -    | 0.5 | 0.3  | -    | -    |
| 11   | 12,505           | 1129                | 265    | 78   | 30.4              | 382    | 334  | 413  | 181                | 92.4                                  | 26.1                        | 8.7  | 12.0 | -    | 1.1  | 6.2 | 3.1  | 1.8  | -    |
| 12   | 13,298           | 501                 | 152    | 19   | 34.1              | 166    | 149  | 186  | 121                | 57.5                                  | 15.2                        | 7.8  | 15.4 | 17.0 | 36.9 | 3.8 | 6.4  | 0.6  | -    |
| 13   | 14,075           | 2150                | 761    | 97   | 39.9              | 940    | 657  | 553  | 188                | 31.6                                  | 33.8                        | 14.2 | 30.8 | 1.2  | 35.3 | 4.7 | 2.0  | 0.2  | -    |
| 14   | 13,381           | 304                 | 112    | 41   | 50.4              | 112    | 90   | 102  | 126                | 71.4                                  | 21.1                        | 17.5 | 15.8 | -    | -    | 0.3 | 0.7  | -    | -    |
| 15   | 14,334           | 774                 | 242    | 34   | 35.6              | 317    | 189  | 268  | 155                | 49.0                                  | 16.7                        | 13.3 | 7.2  | 0.1  | 0.8  | 0.1 | 0.6  | 0.3  | 0.5  |
| 16   | 14,375           | 641                 | 205    | 38   | 37.9              | 238    | 170  | 233  | 146                | 68.8                                  | 7.8                         | -    | 3.0  | 7.2  | 1.6  | 2.2 | -    | 0.6  | -    |
| 17   | 12,993           | 2208                | 911    | 68   | 44.3              | 932    | 704  | 572  | 118                | 32.5                                  | 17.4                        | 3.1  | 5.8  | 6.4  | 8.5  | 1.2 | 1.3  | 1.8  | -    |
| 18   | 13,608           | 1094                | 384    | 37   | 38.5              | 405    | 299  | 390  | 140                | 73.1                                  | 0.7                         | 2.4  | 2.4  | -    | -    | 0.5 | 0.1  | -    | -    |
| 19   | 14,742           | 754                 | 192    | 40   | 30.8              | 275    | 192  | 287  | 162                | 100.0                                 | 1.9                         | -    | 5.7  | -    | -    | 0.5 | -    | 0.5  | -    |
| 20   | 14,061           | 598                 | 183    | 29   | 35.5              | 222    | 165  | 211  | 115                | 83.0                                  | 31.3                        | 8.9  | 0.3  | 0.7  | 3.0  | 2.0 | 6.7  | 1.3  | 5.7  |
| 21   | 13,154           | 3247                | 1048   | 101  | 35.4              | 1144   | 828  | 1275 | 120                | 84.2                                  | 41.8                        | 5.1  | 8.5  | 0.6  | 5.9  | 2.4 | 0.4  | 3.1  | -    |
| 22   | 10,905           | 5211                | 1553   | 341  | 36.4              | 1999   | 1594 | 1618 | 128                | 93.4                                  | 33.8                        | 6.4  | 0.8  | 2.3  | 2.2  | 3.6 | 1.0  | 0.9  | -    |
| 23   | 13,337           | 1126                | 302    | 0    | 26.8              | 393    | 331  | 402  | 142                | 55.0                                  | 28.4                        | 7.0  | 5.1  | 24.2 | 15.1 | 3.1 | 2.1  | 2.4  | 0.8  |
| 24   | 12,353           | 839                 | 182    | 39   | 26.3              | 248    | 288  | 303  | 133                | 85.6                                  | 13.2                        | 1.8  | -    | 0.2  | -    | 3.8 | 2.3  | 1.5  | 0.5  |
| 25   | 13,117           | 712                 | 188    | 52   | 33.7              | 271    | 203  | 238  | 150                | 49.8                                  | 22.2                        | 9.7  | 3.4  | 1.7  | 50.8 | 1.3 | 0.6  | 0.3  | -    |
| 26   | 13,517           | 588                 | 162    | 27   | 32.2              | 227    | 172  | 189  | 105                | 61.8                                  | 18.7                        | 15.5 | 13.8 | 12.1 | 19.1 | 3.9 | 7.1  | 2.0  | 0.3  |
| 27   | 15,059           | 573                 | 169    | 35   | 35.6              | 228    | 146  | 199  | 174                | 99.6                                  | 34.9                        | -    | 5.4  | 1.6  | -    | 3.1 | 1.7  | 1.0  | -    |
| 28   | 13,517           | 1030                | 413    | 78   | 47.6              | 409    | 309  | 312  | 320                | 94.4                                  | 53.4                        | 29.5 | 9.0  | 11.1 | 4.4  | 3.5 | 3.1  | 1.3  | -    |
| 29   | 14,288           | 623                 | 275    | 27   | 48.4              | 248    | 183  | 192  | 160                | 95.3                                  | 22.6                        | 8.3  | 11.4 | 11.2 | 2.6  | 3.5 | 13.5 | -    | -    |
| 30   | 14,601           | 366                 | 96     | 29   | 34.1              | 136    | 83   | 147  | 188                | 97.1                                  | 13.6                        | 0.8  | -    | 1.6  | 0.5  | 1.4 | 2.7  | -    | -    |
| 31   | 13,608           | 1419                | 448    | 53   | 35.3              | 524    | 385  | 510  | 164                | 87.6                                  | 27.8                        | 10.4 | 7.7  | -    | -    | 4.2 | 1.8  | 0.3  | -    |
| 32   | 13,081           | 921                 | 237    | 79   | 34.3              | 330    | 313  | 278  | 165                | 67.5                                  | 35.9                        | 7.5  | 1.3  | 4.9  | 8.4  | 4.9 | 2.9  | 1.6  | 2.6  |
| 33   | 13,381           | 1335                | 454    | 94   | 41.0              | 520    | 481  | 334  | 148                | 78.7                                  | 13.3                        | -    | 8.9  | 1.9  | 0.1  | 2.9 | 1.3  | 0.4  | 0.2  |
| 34   | 13,245           | 3759                | 1087   | 87   | 31.2              | 1299   | 1340 | 1120 | 77                 | 78.4                                  | 8.9                         | 15.2 | 7.1  | 1.2  | 0.4  | 1.9 | 0.2  | 2.1  | 0.2  |
| 35   | 13,608           | 1196                | 451    | 84   | 44.7              | 461    | 282  | 453  | 129                | 79.7                                  | 16.5                        | 16.6 | 5.9  | 7.9  | 9.3  | 8.5 | 5.9  | 1.3  | 0.7  |
| 36   | 12,530           | 1621                | 618    | 56   | 41.6              | 707    | 436  | 478  | 137                | 31.8                                  | 43.8                        | 29.1 | 9.3  | 36.2 | 3.9  | 3.3 | 4.0  | 1.0  | 49.6 |
| 37   | 10,886           | 3580                | 1109   | 190  | 36.3              | 1333   | 1198 | 1049 | 126                | 7.9                                   | 46.8                        | 13.7 | 8.7  | 10.9 | 3.6  | 6.5 | 4.0  | 1.4  | 3.2  |

<sup>1</sup> Rolling herd average for milk (kg per cow per year); <sup>2</sup> Bulk tank SCC ( $\times 10^3$  cells/mL) from the month preceding farm visit; <sup>3</sup> Percentage of all disease events were treated with an antibiotic during one retrospective year; <sup>4</sup> Cases per 100 cow-lactations-year: CM = clinical mastitis (n = 13,997 user-defined events); ME = metritis (n = 4948); RFM = retained fetal membranes (n = 3538); KE = ketosis (n = 3090); FD = feet disorders (n = 5176); DA = displaced abomasum (n = 1648); PN = pneumonia (n = 1277); MF = milk fever (n = 929); and DI = diarrhea (n = 1126); Dash indicates disease was not recorded in the farm computer-based records.
